# Supplementary material
Source: publisher site journal article supplement (http://kjim.org/upload/media/kjim-2023-115-Supplementary-Fig-1.pdf)
Supplement: Supplementary file 1 [file kjim-2023-115-Supplementary-Fig-1.pdf]

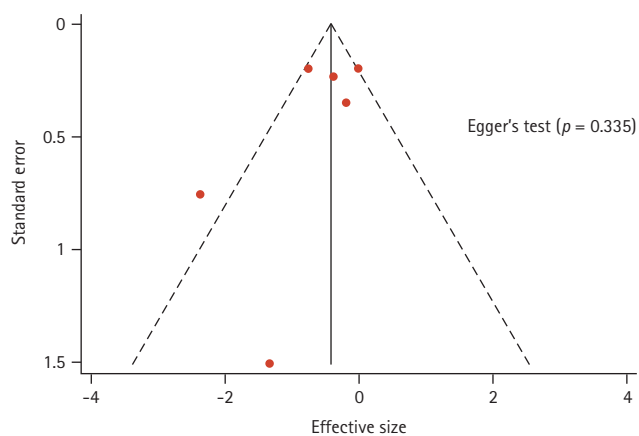

**Supplementary Figure.** Funnel plot assessing publication bias (funnel plot with pseudo 95% confidence limits).
